# Supplementary material for: Acquired CARD11 Mutation Promotes BCR Independence in Diffuse Large B Cell Lymphoma
Source: PubMed Central journal article supplement (PMC7116686; doi:10.1200/po.20.00360), 2021-01-12
Supplement: EMS113469-supplement-Supplementary_methods.pdf [file EMS113469-supplement-Supplementary_methods.pdf]

1 **Acquired CARD11 mutations promote BCR independence in Diffuse Large B-Cell**  
2 **Lymphoma.**

3

4 **Supplementary Methods**

5

6 **Patient Sample**

7 The patient provided explicit written informed consent for the publication of photographic  
8 images. Biopsy samples were obtained with written informed consent for tissue banking and  
9 DNA sequencing. The study protocol was approved by the East of England Cambridge South  
10 Research Ethics Committee (approval reference number 07/MRE05/44). Samples were  
11 provided by the Cambridge Blood and Stem Cell Biobank, which is supported by the  
12 Cambridge NIHR Biomedical Research Centre, Wellcome Trust – MRC Stem Cell Institute  
13 and the Cambridge Experimental Cancer Medicine Centre, UK.

14

15 **DNA extraction**

16 600 µl Lysis Buffer and 15 µl Proteinase K solution were used to resuspend mononuclear cells  
17 from disaggregated bone marrow trephine and incubated at 65° for 15 min. Genomic DNA  
18 was precipitated using isopropanol and resuspended in TE Buffer.

19

20 **Whole exome sequencing and analysis**

21 Whole exome sequencing was performed on tumor biopsy samples from diagnosis, pre-  
22 treatment, relapse and germline control (Novogene). For whole exome sequencing, libraries  
23 were generated using the Agilent SureSelectXT Reagent Kit+Agilent SureSelect Human All  
24 ExonV6 and sequenced on the Illumina NovaSeq 6000 using 150 base paired-end sequencing  
25 (Q30≥80%).

26 All samples were aligned to the hg38 version of the reference human genome using bwa  
27 0.7.15 in alt contig aware mode as described by the authors<sup>1</sup>. The generated SAM file was  
28 compressed into a BAM file and sorted by genomic position using samtools 1.3.1<sup>2</sup>. The sorted

29 BAM files were subject to Base Quality Score Recalibration and Indel Realignment as  
30 specified in the Genome-Analysis Toolkit (GATK)<sup>3</sup> best practices<sup>4,5</sup>. For somatic variant calling  
31 the following GATK's MuTect2<sup>6</sup> was used. A panel of normals (PON) was generated using the  
32 germline samples with GATK's (version 4.0.3.0) *Mutect2* and *CreateSomaticPanelOfNormals*  
33 algorithms. Variants were called in all tumours using the PON and the matched germline  
34 sample with the GATK's *MuTect2* algorithm to generate a VCF file<sup>6</sup>. Finally, the VCF files were  
35 filtered with GATK's *FilterMutectCalls* algorithm. The resulting VCF file was annotated and  
36 prioritized using *annovar*<sup>7</sup>. CNVs were called using GATK's (version 4.1.4.0) best practices  
37 for Somatic copy number variant discovery<sup>3</sup>. Copy ratio was adjusted for tumour purity. Gains  
38 associated with 2 or more extra copies were defined as amplifications. Non-CNV Structural  
39 variations were called using *Delly* according to their best practices<sup>8</sup>. The samples were  
40 sequenced to an average of 96,176,220 reads per sample and an average coverage of 77.75x  
41 (fold enrichment of 38.58).

## 42 **Sanger sequencing**

43 The CARD11 K215T region was analyzed in the diagnosis, pre-treatment and relapse sample  
44 by Sanger sequencing. Primers were designed to generate an amplicon size of 99bp and  
45 ordered from IDT. PCR reaction was performed using 200ng genomic DNA with Q5<sup>®</sup> High-  
46 Fidelity 2X Master Mix (NewEngland). The following PCR conditions were used: 98°C for 30s,  
47 35 cycles of 98°C for 10s, 60°C for 20s and 72°C for 20s, and the final extension, 72°C for 2  
48 min. The resulting PCR product was purified using a Qiaquick PCR purification kit (Qiagen)  
49 and sequenced at GATC (Germany).

## 50 **Plasmid construction and viral transduction**

51 To generate the CARD11 WT overexpression plasmid, the CDS sequence for CARD11 WT  
52 (NM\_032415, NCBI) was designed as g-block and purchased from IDT. This was cloned into  
53 pRCMV-TOP vector using Gibson Assembly. The CARD11 K215T overexpression plasmid  
54 was generated from the pRCMV-TOP-CARD11 WT plasmid. Mutation sequence (K215T,

55 c.644A>C) was obtained from IDT as g-blocks and cloned into the SbfI and SfiI-digested  
56 pRCMV-TOP-CARD11 WT using Gibson Assembly. Capillary sequencing was used for  
57 plasmid verification. 293T cells (Clontech) were transfected with pRCMV-TOP (Empty Vector),  
58 pRCMV-TOP-CARD11 WT/K215T, and packaging plasmids using TransIT-293 (Mirus). Virus  
59 supernatant was harvested and filtered (0.48micron) 48 hours post transfection and  
60 spinoculated into U2932 cells maintained in 10% FCS RPMI.

### 61 **Ibrutinib sensitivity assay**

62 The cell line U2932 was transduced with empty vector or CARD11 WT or K215T and selected  
63 using puromycin. Cells were then treated with the indicated concentration of ibrutinib and cell  
64 viability measured at day 5 using the CellTiter-Glo® Luminescent Cell Viability Assay per  
65 manufacture's instruction. Luminescence was read with SpectraMax M2 microplate reader.

### 66 **Data Availability**

67 Whole exome sequencing files have been uploaded to EGA.

68

69

70

71

72

73

74

75

76

77

78

79

80

81

82 **Supplementary References**

- 83 1. Li, H. & Durbin, R. Fast and accurate short read alignment with Burrows-  
84 Wheeler transform. *Bioinformatics* **25**, 1754–1760 (2009).
- 85 2. Li, H. *et al.* The Sequence Alignment/Map format and SAMtools.  
86 *Bioinformatics* **25**, 2078–2079 (2009).
- 87 3. McKenna, A. *et al.* The Genome Analysis Toolkit: A MapReduce framework for  
88 analyzing next-generation DNA sequencing data. *Genome Res.* **20**, 1297–  
89 1303 (2010).
- 90 4. DePristo, M. a. *et al.* A framework for variation discovery and genotyping using  
91 next- generation DNA sequencing data. *Nat Genet* **43**, 491–498 (2011).
- 92 5. Auwera, G. A. Van Der *et al.* From FastQ data to high confidence variant calls:  
93 the Genome Analysis Toolkit best practices pipeline. *Curr Protoc*  
94 *Bioinformatics* vol. 11 (2014).
- 95 6. Cibulskis, K. *et al.* Sensitive detection of somatic point mutations in impure and  
96 heterogeneous cancer samples. *Nat. Biotechnol.* **31**, 213–219 (2013).
- 97 7. Wang, K., Li, M. & Hakonarson, H. ANNOVAR: Functional annotation of  
98 genetic variants from high-throughput sequencing data. *Nucleic Acids Res.* **38**,  
99 1–7 (2010).
- 100 8. Rausch, T. *et al.* DELLY: Structural variant discovery by integrated paired-end  
101 and split-read analysis. *Bioinformatics* **28**, 333–339 (2012).

102

103

104

105

106

107 **Supplementary Data Files**

108 **Supplementary Data 1.** Summary of germline filtered variants with variant read count >5 and  
109 allele fraction >0.1 identified from whole exome sequencing performed on DNA from  
110 diagnostic, pretreatment and relapse biopsies.

111 **Supplementary Data 2.** Summary of copy number changes detected from whole exome  
112 sequencing at diagnosis, pretreatment and relapse.

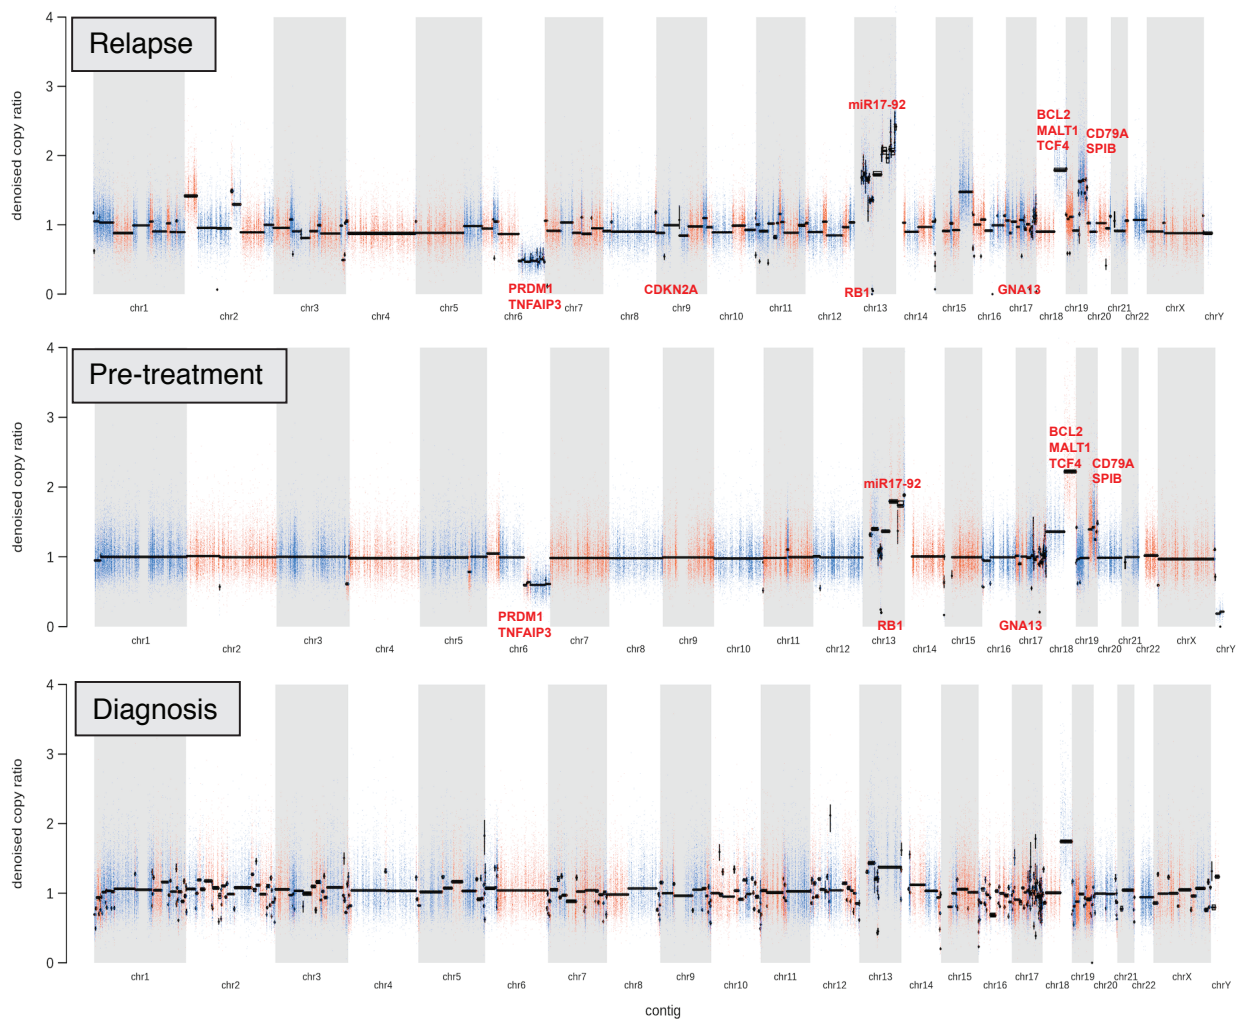

**Supplementary Figure 1**

Copy number change detected at the indicated timepoints. The position of known lymphoma driver genes is indicated.

## MYD88

## CD79B

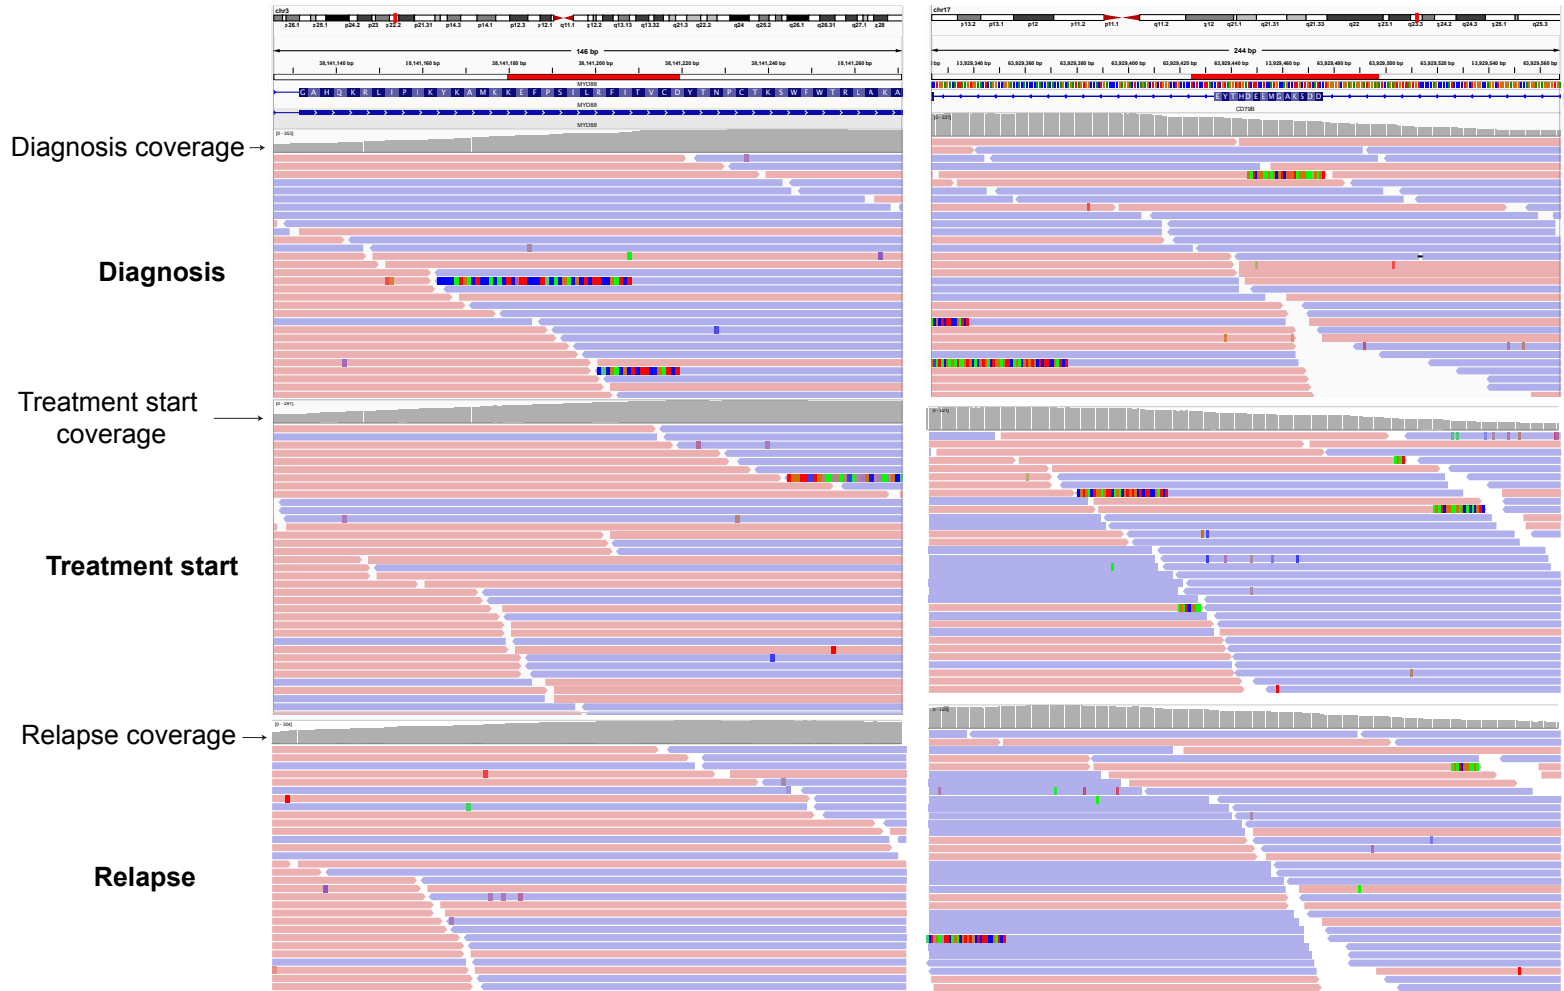

### Supplementary Figure 2

Summary of exome sequencing reads mapping to mutation hotspot regions of *MYD88* and *CD79B* confirming that both genes are wild type at these genomic locations at each timepoint.

# CARD11

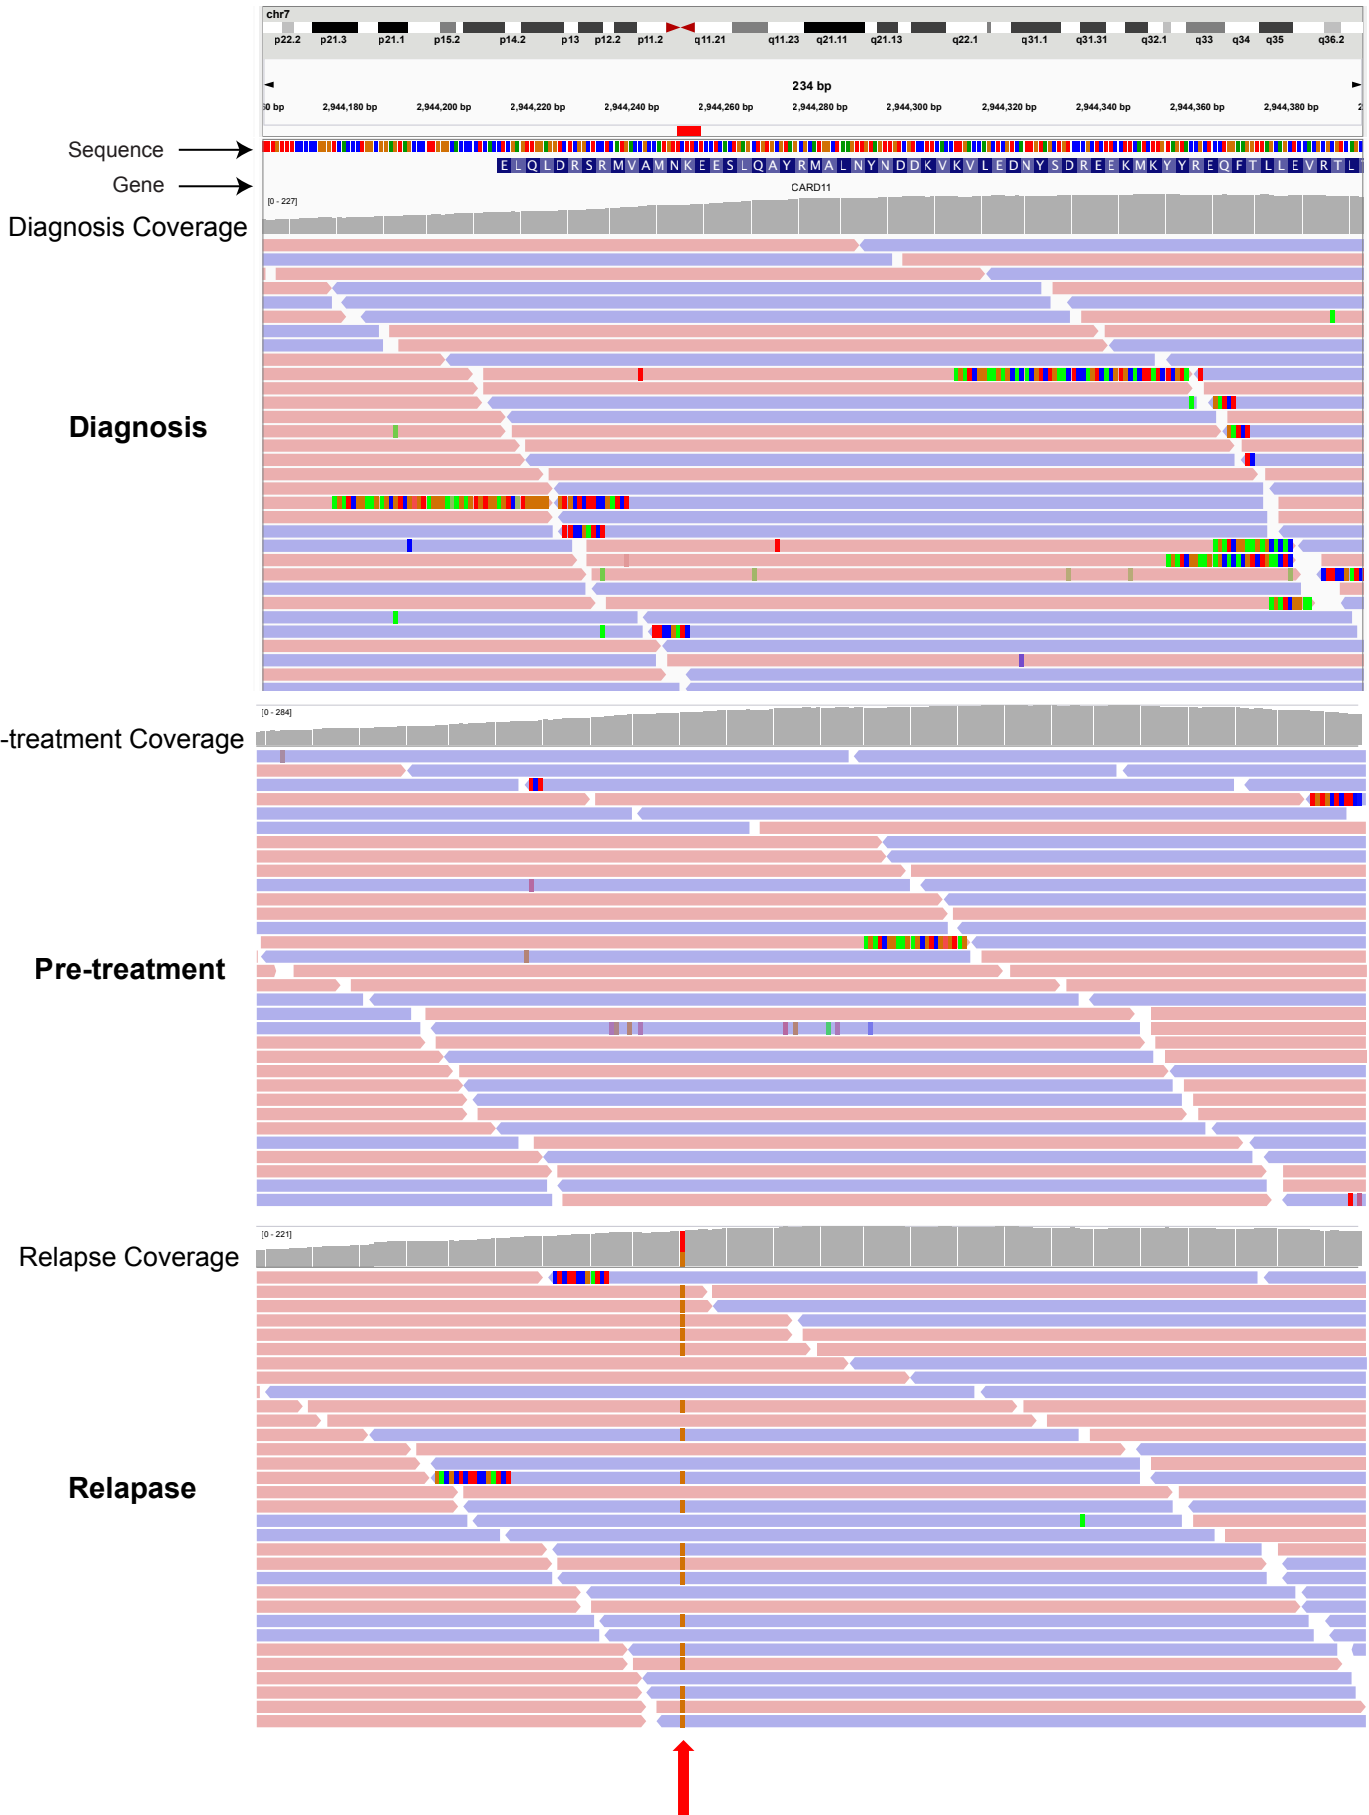

## Supplementary Figure 3

Summary of exome sequencing reads mapping to the region of the *CARD11* locus containing detected variant at the indicated timepoints, showing acquisition of the *CARD11\_K215T* mutation (red arrow) at relapse.
